# Supplementary material for: Perceptions of Antibiotic Therapy Among Nursing Home Residents: Perspectives of Caregivers and Residents in a Mixed Exploratory Study
Source: MDPI journal article supplement (doi:10.3390/antibiotics8020066), 2019-05-27
Supplement: s1 [file s1]

Table 3: Doctors' reports (N=7)

| Questionnaire statements                                                                                                | Strongly disagree | Disagree | Neutral | Agree | Strongly agree |
|-------------------------------------------------------------------------------------------------------------------------|-------------------|----------|---------|-------|----------------|
| Knows what an antibiotic is used for                                                                                    | 0                 | 0        | 1       | 3     | 3              |
| Knows what "antibiotic resistance" refers to                                                                            | 0                 | 1        | 3       | 1     | 2              |
| Nurses are sources of information for antibiotics                                                                       | 0                 | 1        | 1       | 2     | 3              |
| The Internet is not their main source of information for antibiotics                                                    | 0                 | 0        | 1       | 2     | 4              |
| Residents demand antibiotics from the health professional                                                               | 0                 | 2        | 1       | 3     | 1              |
| Residents discuss with the nurse and doctors when antibiotic therapy is considered or not necessary                     | 0                 | 2        | 0       | 3     | 2              |
| Considers that antibiotics are useful for all smelly urine                                                              | 1                 | 3        | 0       | 1     | 2              |
| Considers that the prompt administration of antibiotics is necessary to avoid complications regardless of the infection | 3                 | 2        | 1       | 1     | 0              |
| The resident considers that antibiotics are necessary whatever the cough                                                | 2                 | 3        | 0       | 2     | 0              |
| The resident considers that, without antibiotics, the treatment of an infection will not be effective                   | 2                 | 2        | 1       | 1     | 1              |
| The resident knows that antibiotics are not used to fight viral infections                                              | 1                 | 2        | 1       | 1     | 2              |
| The resident considers that not all infections necessarily require antibiotics                                          | 1                 | 0        | 4       | 2     | 0              |
| The resident considers that antibiotics avoid all complications when administered                                       | 1                 | 3        | 2       | 1     | 0              |
| The resident consider that antibiotics are very effective, even on viral infections                                     | 2                 | 3        | 2       | 0     | 0              |
| An awareness campaign toward residents is needed about antibiotics                                                      | 0                 | 0        | 1       | 3     | 3              |
